# Supplementary material
Source: Springer Nature journal article supplement (https://www.springerprofessional.de/resource/supplementary/40327_2013_5_MOESM8_ESM.pdf/10801436)

**Parking Garage**

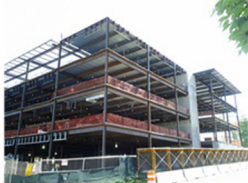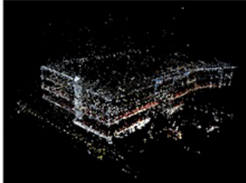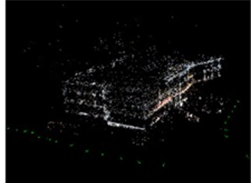

**Center  
for the Arts**

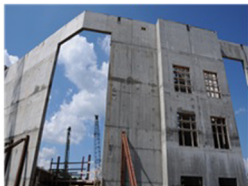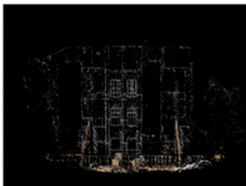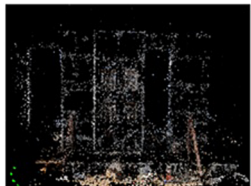

**Norris Hall**

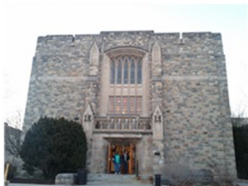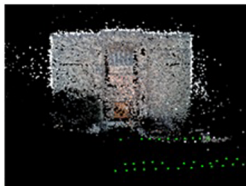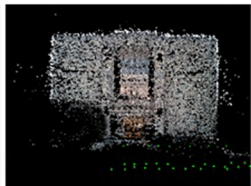

**Patton Hall**

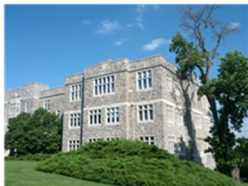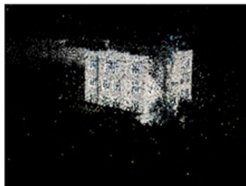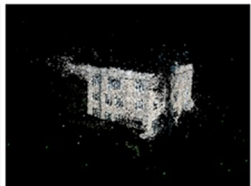

**(a)**

**(b)**

**(c)**

Supplement: MOESM8 [file 10801436]
